# Supplementary figures and images for: Bacterial Nucleoid-Associated Protein Uncouples Transcription Levels from Transcription Timing
Source: PubMed Central journal article supplement — mBio. 2014 Oct 7;5(5):e01485-14. doi: 10.1128/mBio.01485-14 (PMC4196223; doi:10.1128/mbio.01485-14), 2014-10-07

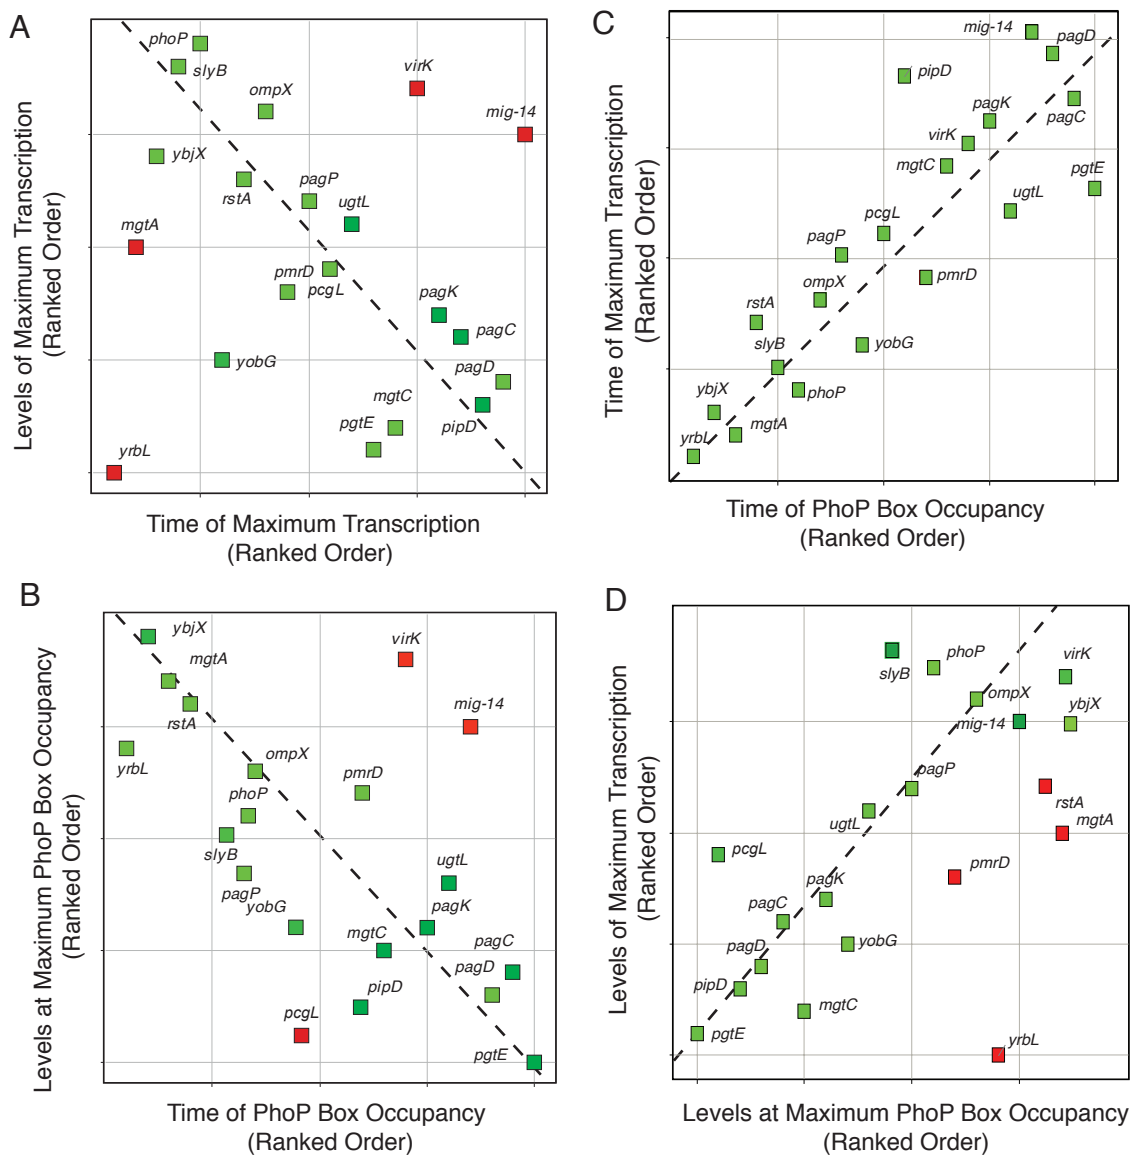

Fig. S1

Supplement: mbo005142014sf1.pdf [file mbo005142014sf1.pdf]

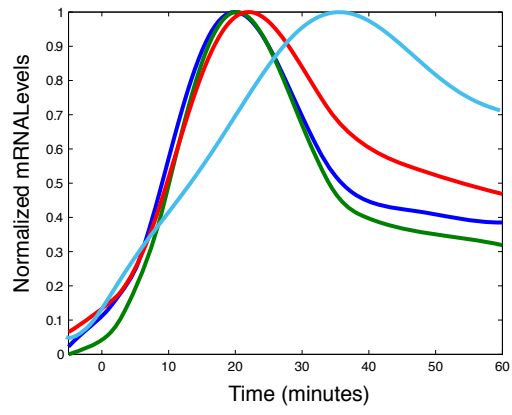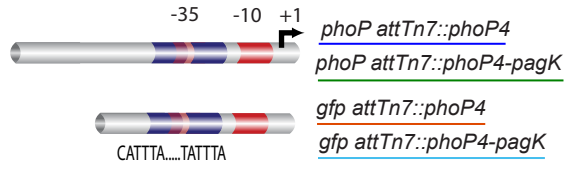

Fig. S3

Supplement: mbo005142014sf3.pdf [file mbo005142014sf3.pdf]

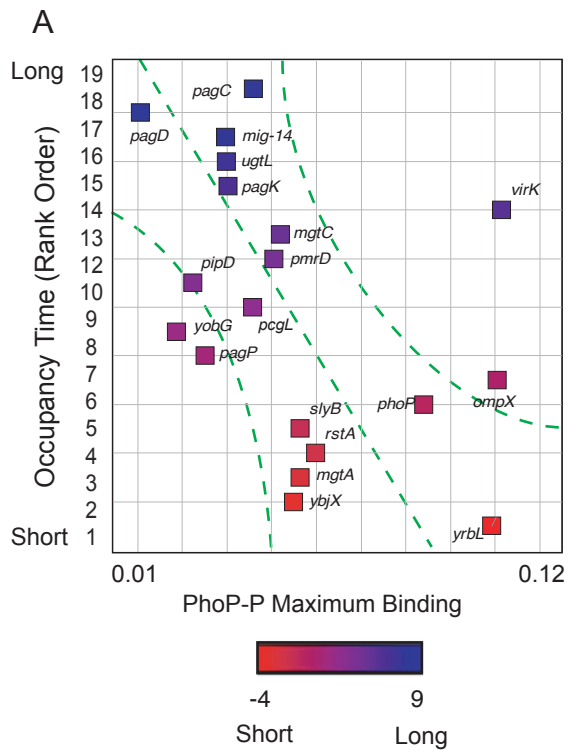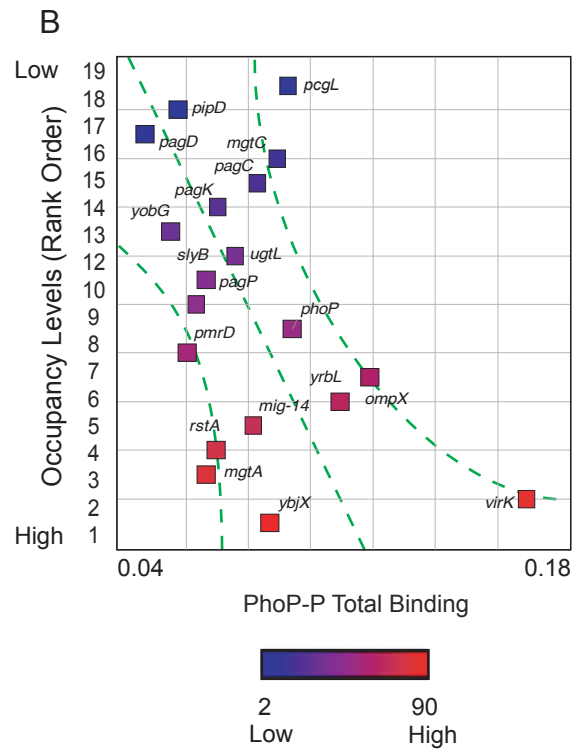

Fig. S4

Supplement: mbo005142014sf4.pdf [file mbo005142014sf4.pdf]
